# Supplementary material for: Synthesis and polymerization of cyclobutenyl-functionalized polylactide and polycaprolactone: a consecutive ROP/ROMP route towards poly(1,4-butadiene)-g-polyesters
Source: Royal Society of Chemistry journal article supplement (doi:10.1039/c3py01611k), 2014-01-01
Supplement: c3py01611k1.pdf [file c3py01611k1.pdf]

## Supporting Information

# Synthesis and Polymerization of Cyclobutenyl-Functionalized Polylactide and Polycaprolactone: A Consecutive ROP/ROMP Route to Poly(1,4-butadiene)-*g*-Polyesters

*Flavien Leroux, Véronique Montembault, Sagrario Pascual, William Guérin<sup>#</sup>, Sophie M.*

*Guillaume<sup>#</sup> and Laurent Fontaine<sup>\*</sup>*

Institut des Molécules et des Matériaux du Mans, Equipe Méthodologie et Synthèse des  
Polymères, UMR 6283 CNRS, Université du Maine, Avenue Olivier Messiaen, 72085 Le  
Mans Cedex 9, France

<sup>#</sup> Institut des Sciences Chimiques de Rennes, Organometallics, Materials and Catalysis, UMR  
6226 CNRS, Université de Rennes 1, Campus de Beaulieu, 35042 Rennes Cedex, France

\* Corresponding author: [laurent.fontaine@univ-lemans.fr](mailto:laurent.fontaine@univ-lemans.fr)

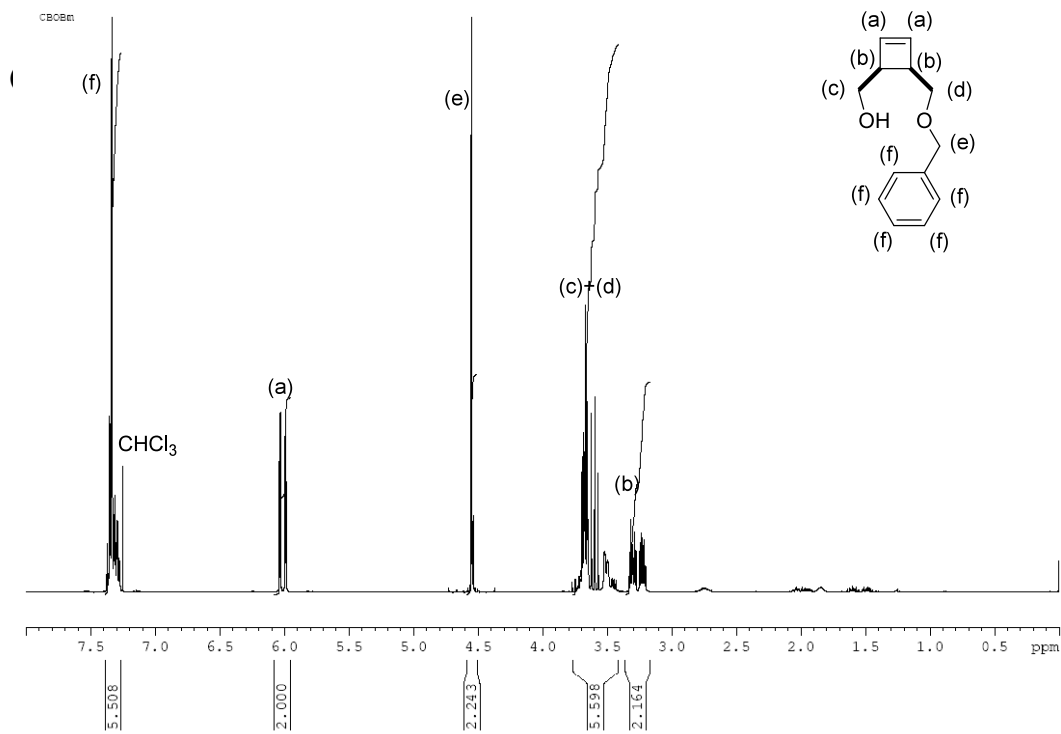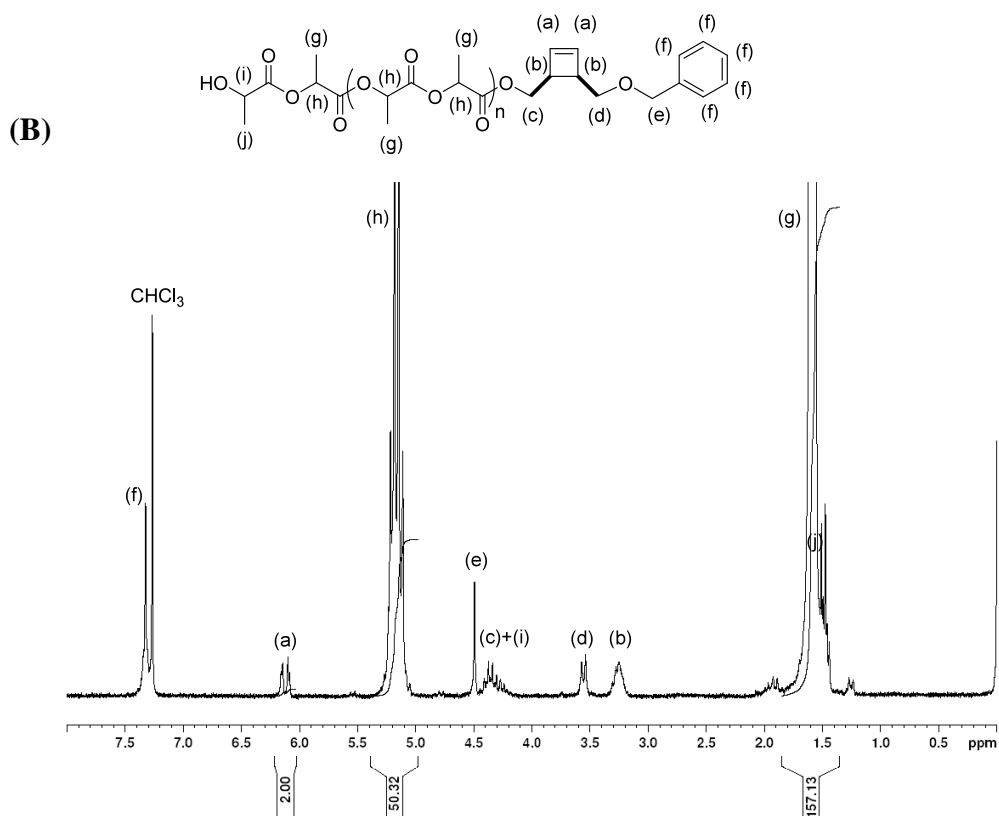

**Figure S1.**  $^1\text{H}$  NMR spectra (200 MHz,  $\text{CDCl}_3$ , 25  $^\circ\text{C}$ ) of (A) **3** and (B) the reaction mixture issued from the ROP of LA in DCM at 35  $^\circ\text{C}$  using inimer **3** as the initiator and TBD as the catalyst for a reaction time of 1 h (Table 1, run 1).

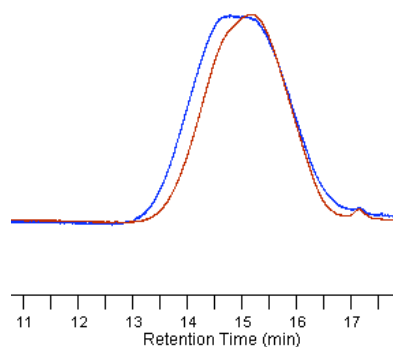

**Figure S2.** SEC traces in THF of the 3-PLA<sub>24</sub> obtained by ROP using TBD as the catalyst after a reaction time of (A) 1 h (Table 1, run 1) and (B) 0.33 h (Table 1, run 2).

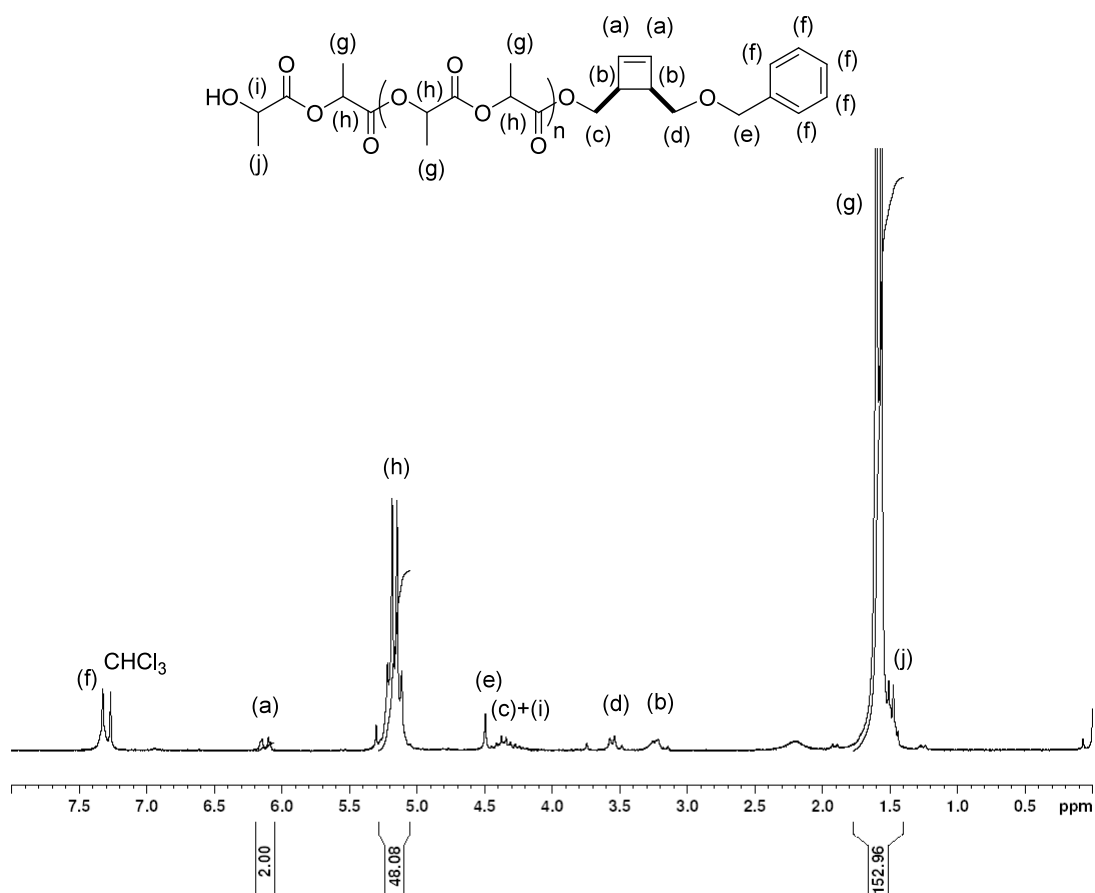

**Figure S3.** <sup>1</sup>H NMR spectrum (200 MHz, CDCl<sub>3</sub>, 25 °C) of 3-PLA<sub>24</sub> issued from the ROP of LA in DCM at 35 °C using inimer **3** as the initiator and DMAP as the catalyst with a [LA]<sub>0</sub>/[**2**]<sub>0</sub> ratio of 14 (Table 1, run 4).

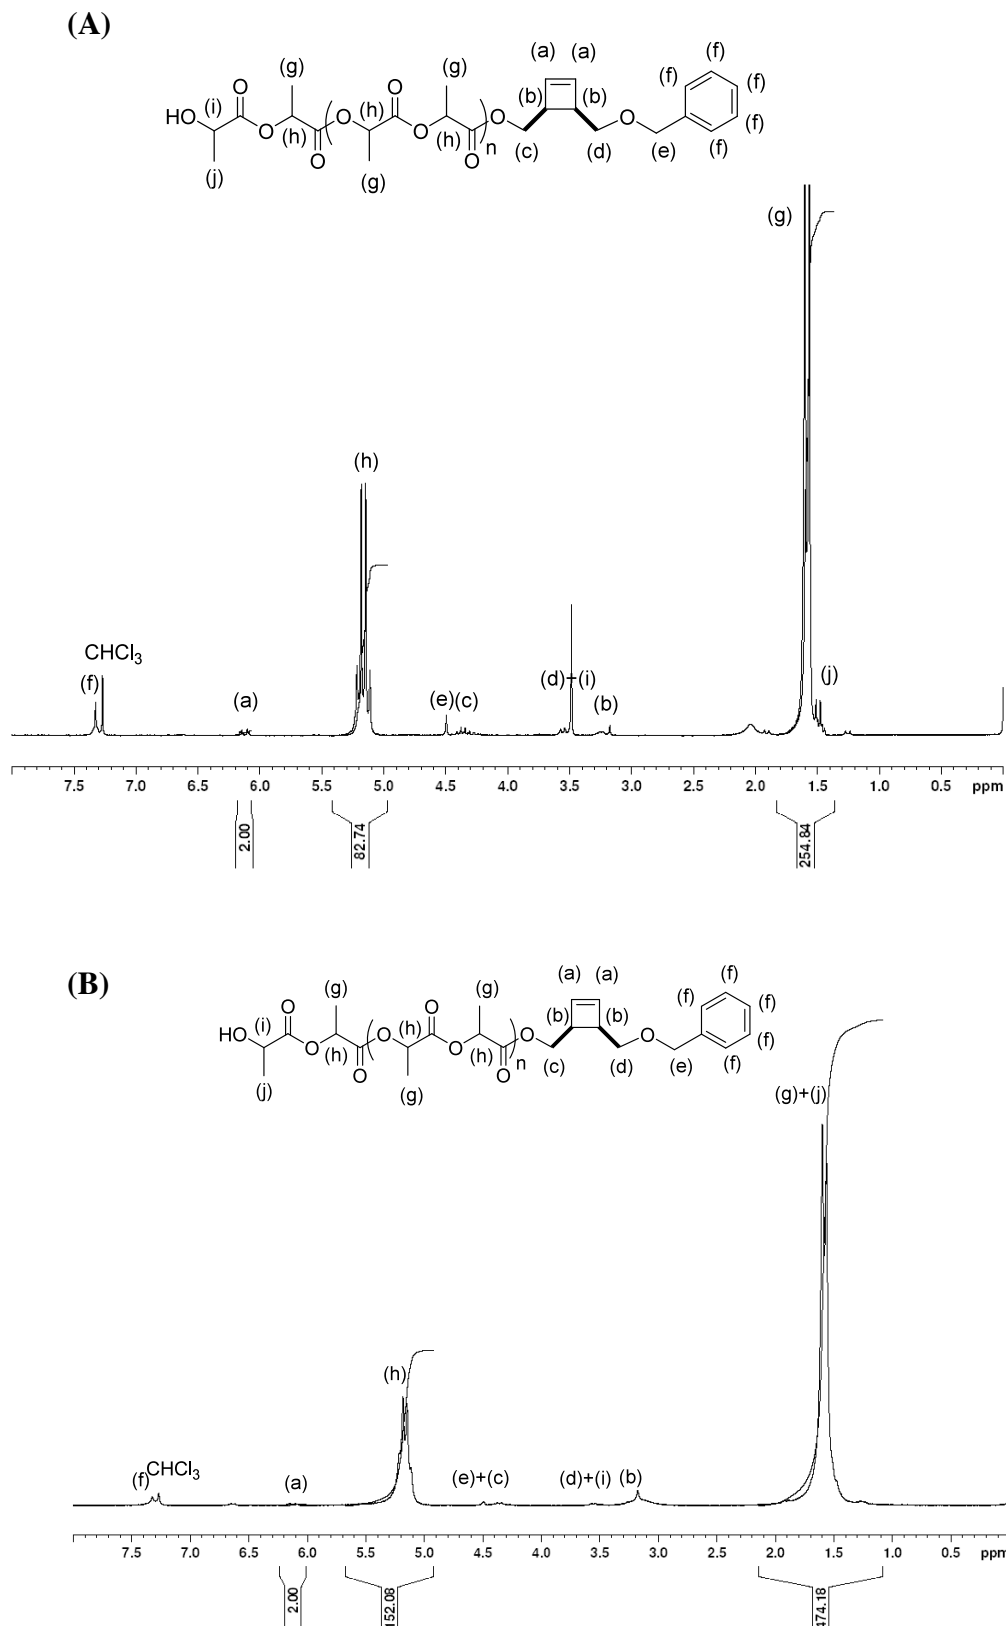

**Figure S4.**  $^1\text{H}$  NMR spectra (200 MHz,  $\text{CDCl}_3$ , 25  $^\circ\text{C}$ ) of **3-PLA** issued from the ROP of LA in DCM at 35  $^\circ\text{C}$  using inimer **3** as the initiator and DMAP as the catalyst with a  $[\text{LA}]_0/[\mathbf{3}]_0$  ratio of (A) 35 (Table 1, run 5) and (B) 70 (Table 1, run 6).

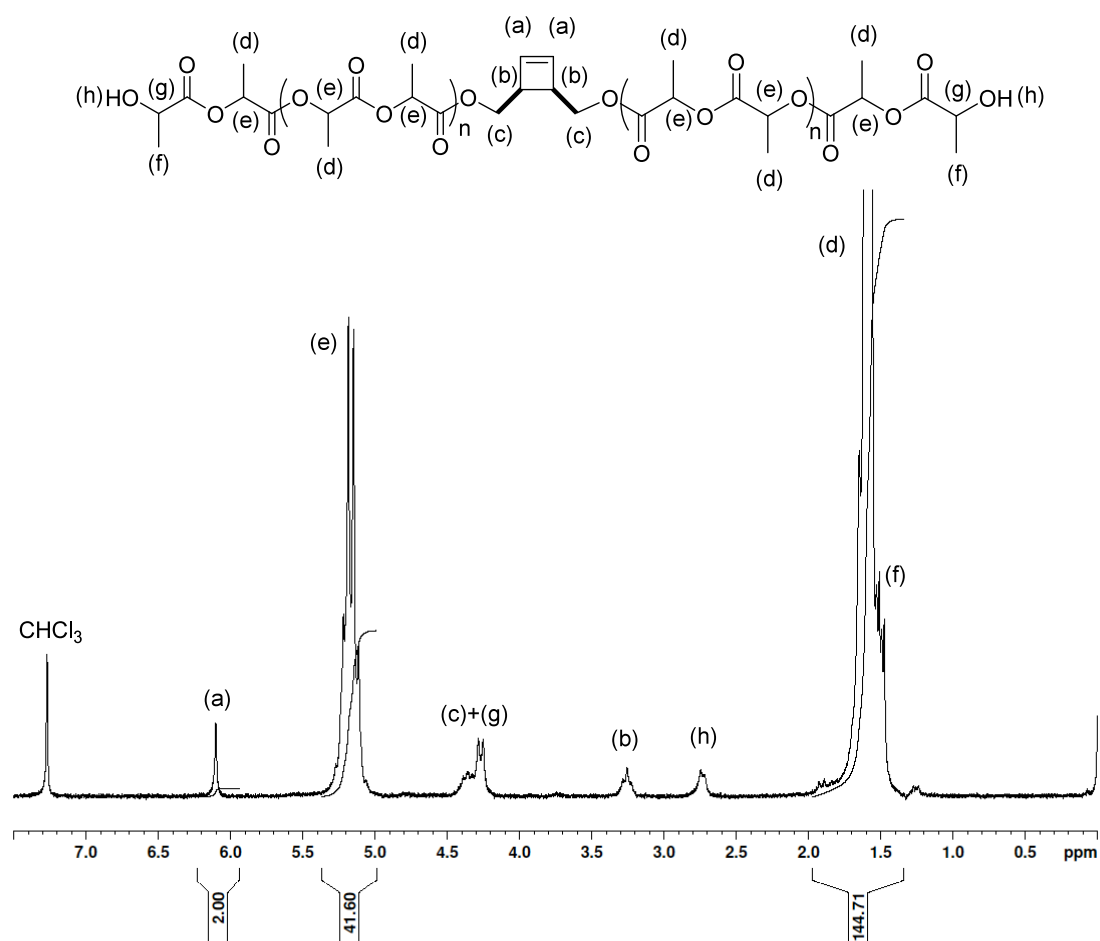

**Figure S5.** <sup>1</sup>H NMR spectrum (200 MHz, CDCl<sub>3</sub>, 25 °C) of **2-PLA**<sub>20</sub> issued from the ROP of LA in DCM at 35 °C using inimer **2** as the initiator and DMAP as the catalyst with a [LA]<sub>0</sub>/[**2**]<sub>0</sub> ratio of 14 (Table 1, run 7).

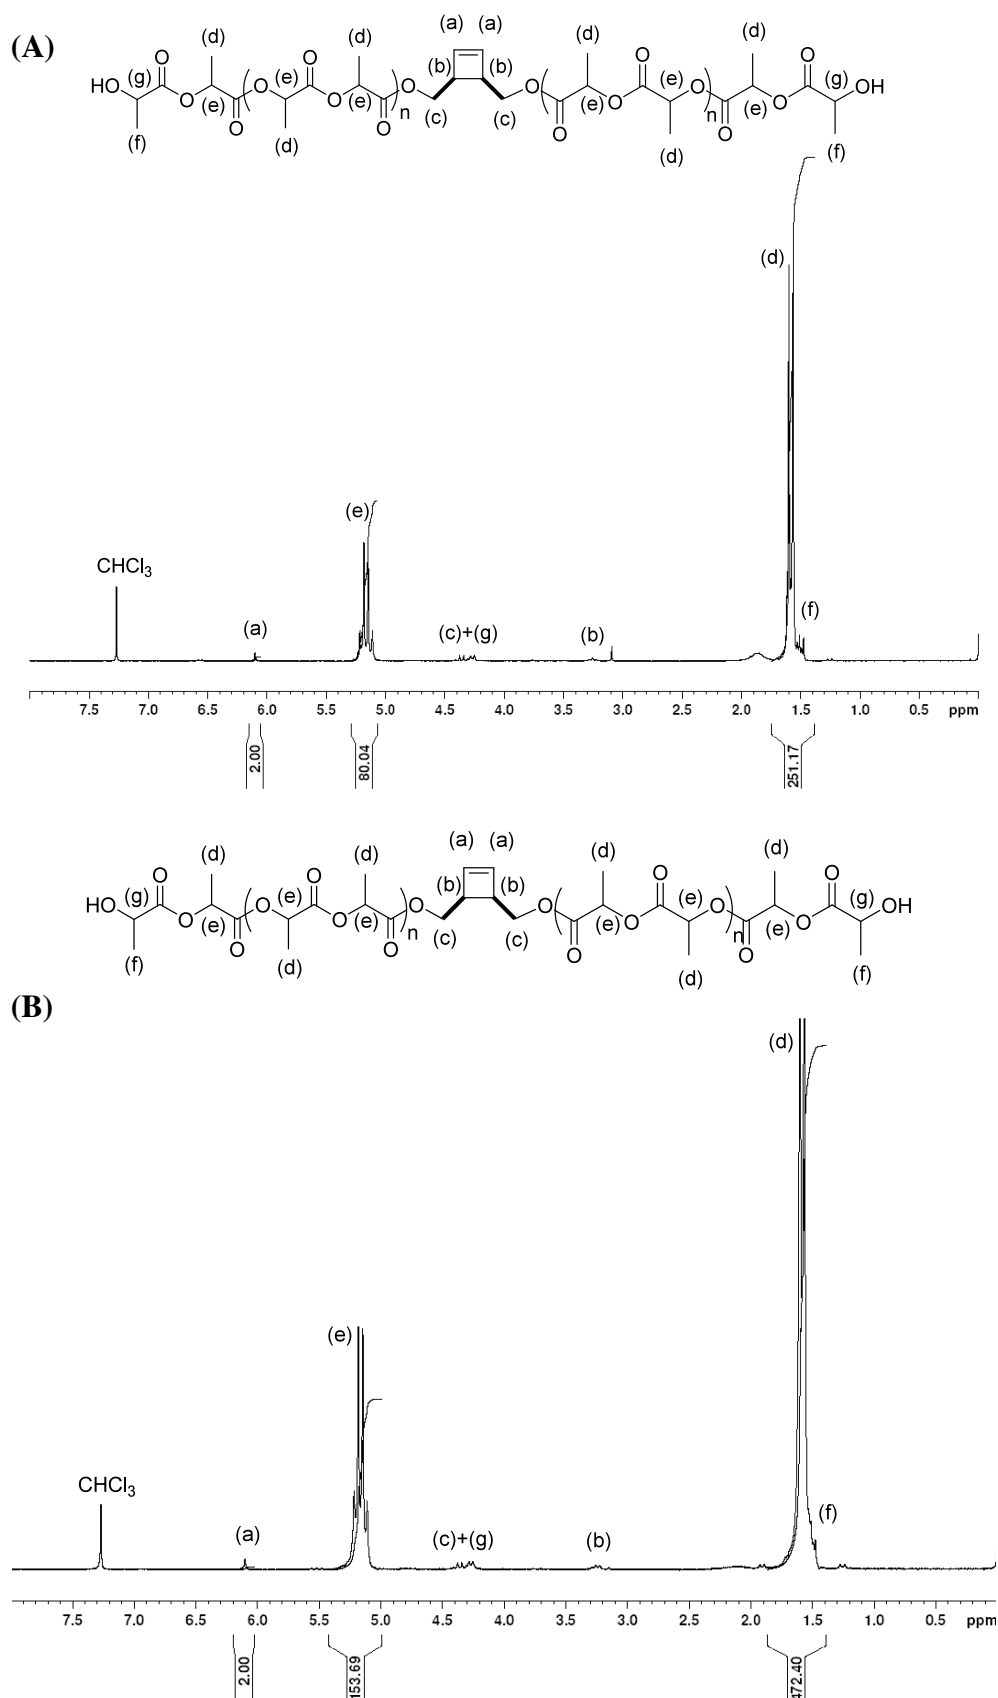

**Figure S6.**  $^1\text{H}$  NMR spectra (200 MHz,  $\text{CDCl}_3$ , 25  $^\circ\text{C}$ ) of **2-PLA** issued from the ROP of LA in DCM at 35  $^\circ\text{C}$  using inimer **2** as the initiator and DMAP as the catalyst with a  $[\text{LA}]_0/[\mathbf{2}]_0$  ratio of (A) 35 (Table 1, run 8) and (B) 70 (Table 1, run 9).

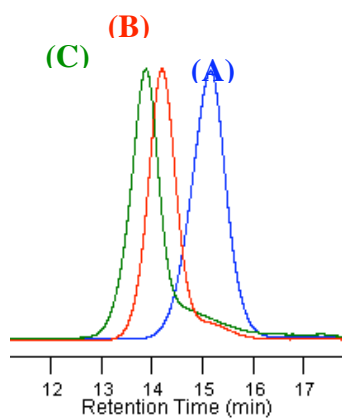

**Figure S7.** SEC traces for the (A) **2-PLA<sub>20</sub>** (Table 1, run 7), (B) **2-PLA<sub>40</sub>** (Table 1, run 8) and (C) **2-PLA<sub>77</sub>** (Table 1, run 9).

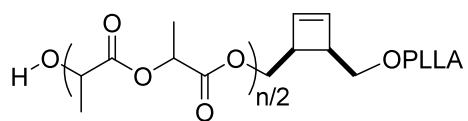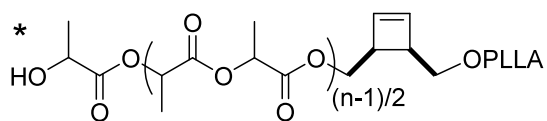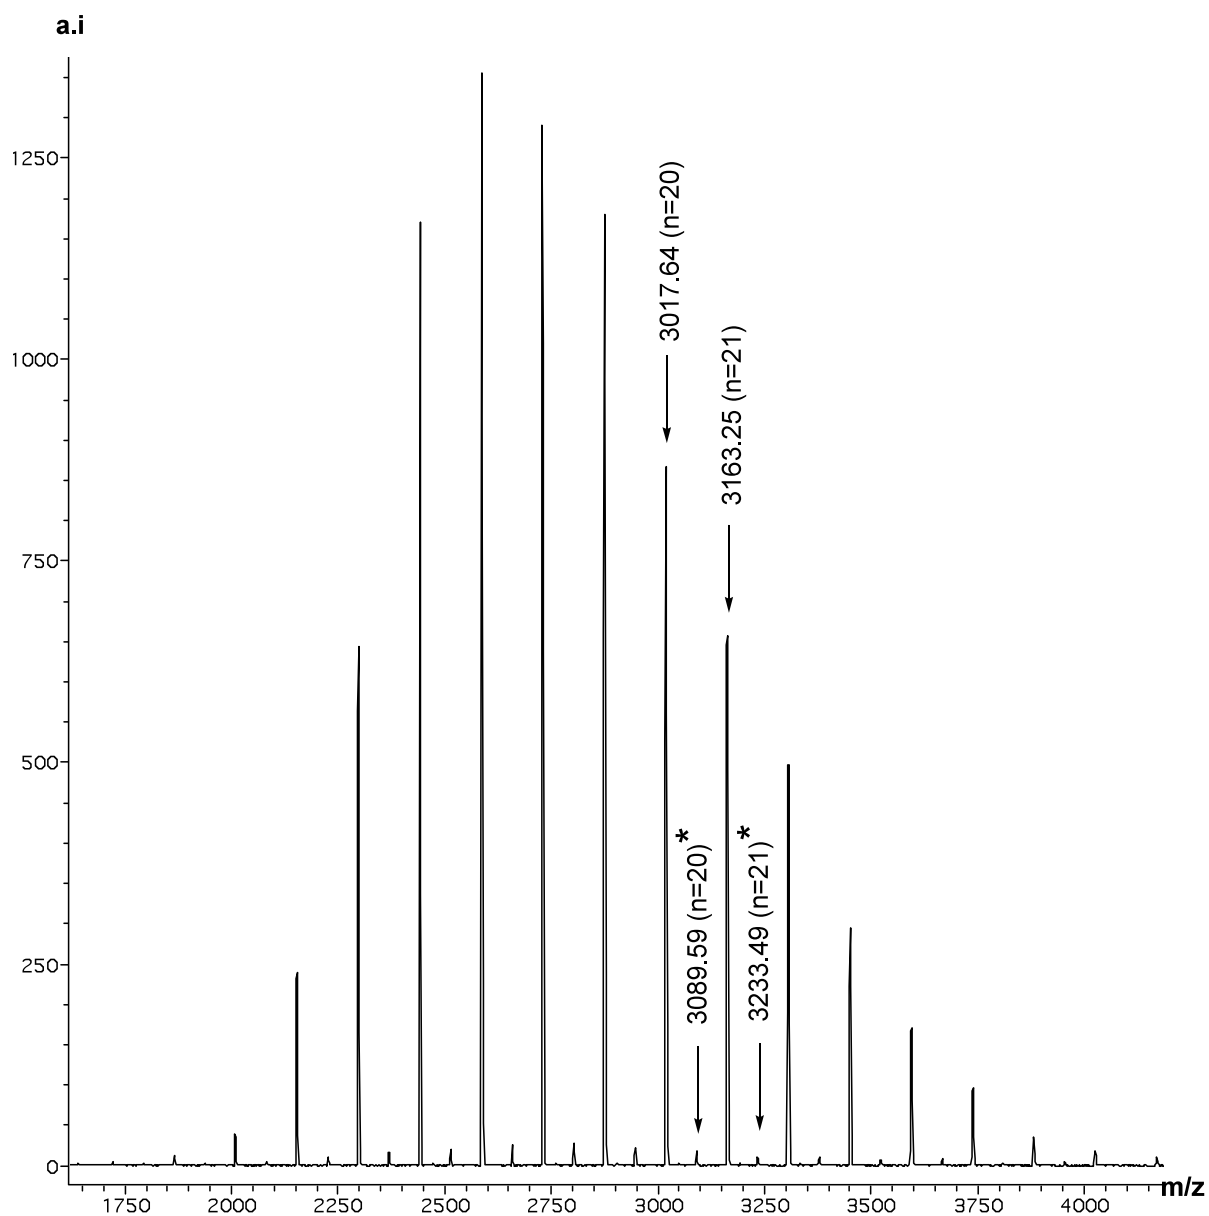

**Figure S8.** MALDI-TOF mass spectrum (matrix: DCTB + NaTFA) of the cyclobutenyl-functionalized PLA synthesized by ROP using inimer **2** as the initiator and DMAP as the catalyst in DCM at 35 °C with  $[LA]_0/[2]_0 = 14/1$  (Table 1, run 7).



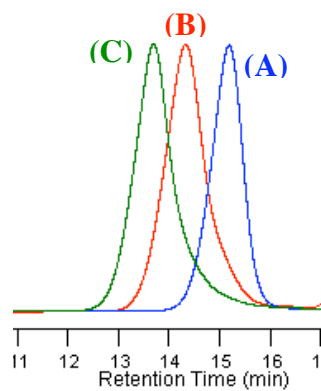

**Figure S9.** SEC traces for the (A) **2-PCL<sub>19</sub>** (Table 2, run 1), (B) **2-PCL<sub>47</sub>** (Table 2, run 2) and (C) **2-PCL<sub>81</sub>** (Table 2, run 3).

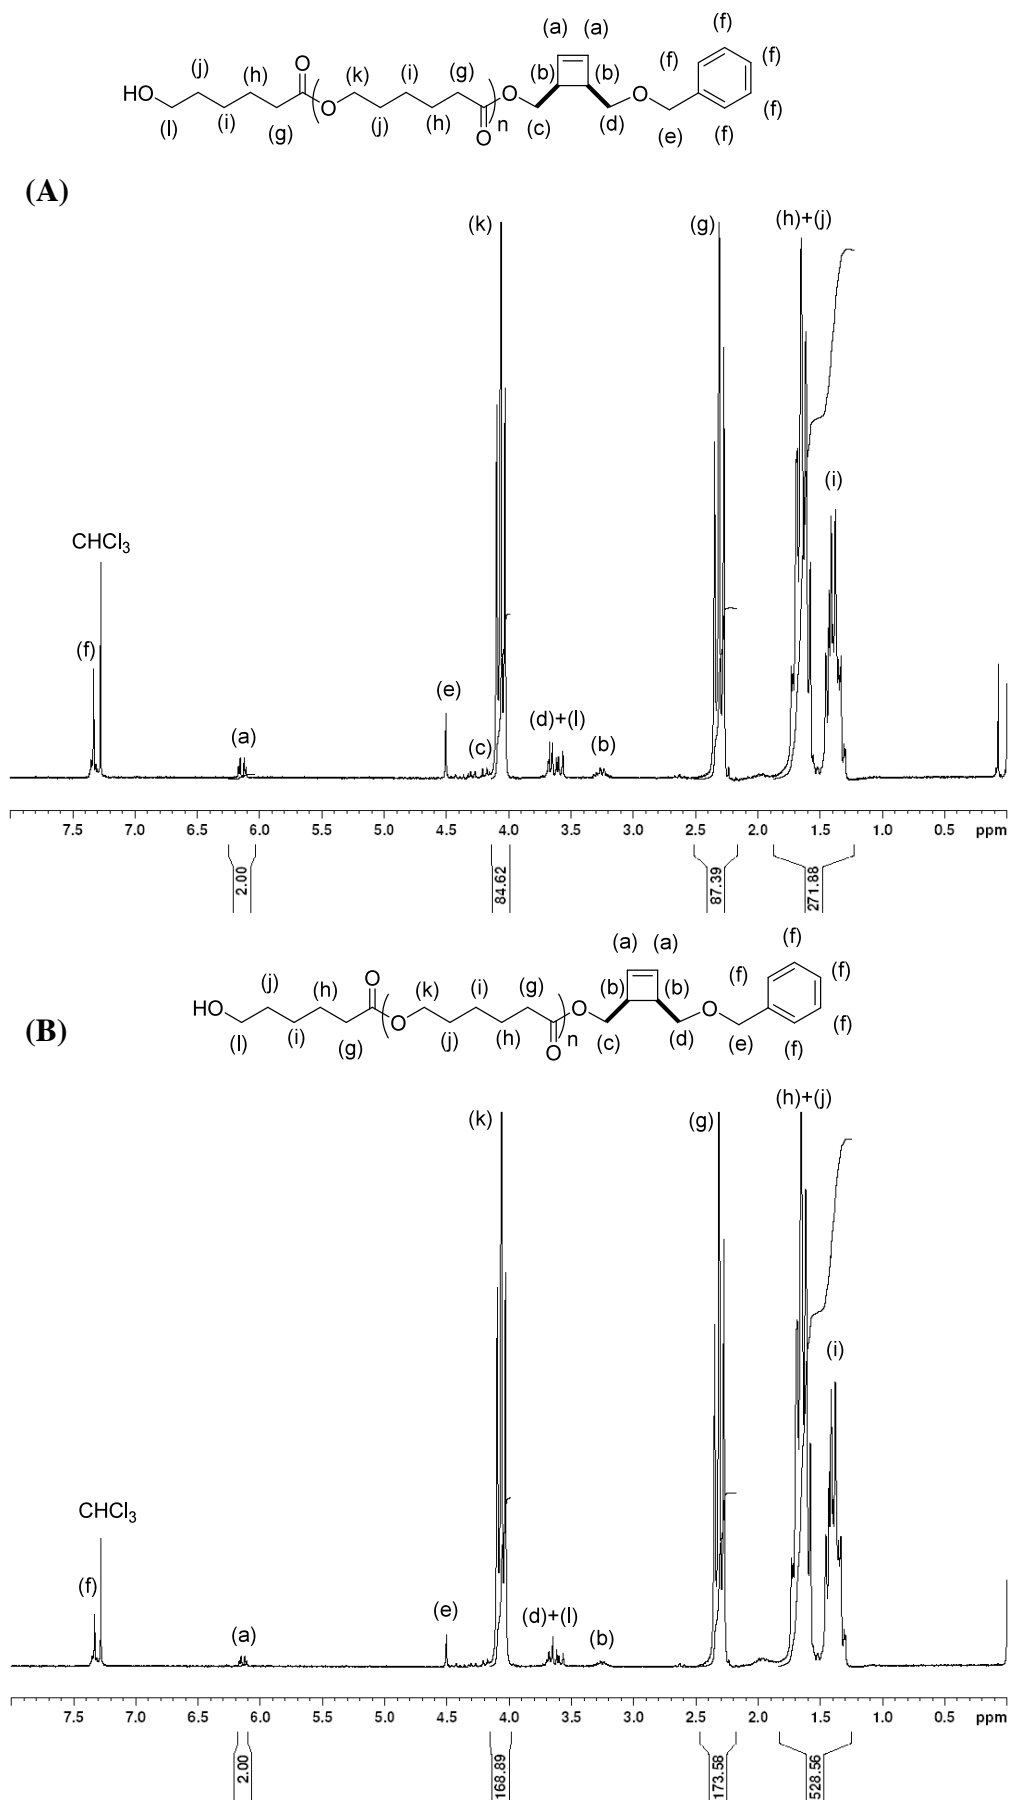

**Figure S10.**  $^1\text{H}$  NMR spectra (200 MHz,  $\text{CDCl}_3$ , 25  $^\circ\text{C}$ ) of **3-PCL** issued from the ROP of CL in toluene at 25  $^\circ\text{C}$  using inimer **3** as the initiator and TBD as the catalyst with a  $[\text{CL}]_0/[\mathbf{3}]_0$  ratio of (A) 48 (Table 2, run 5) and (B) 96 (Table 2, run 7).

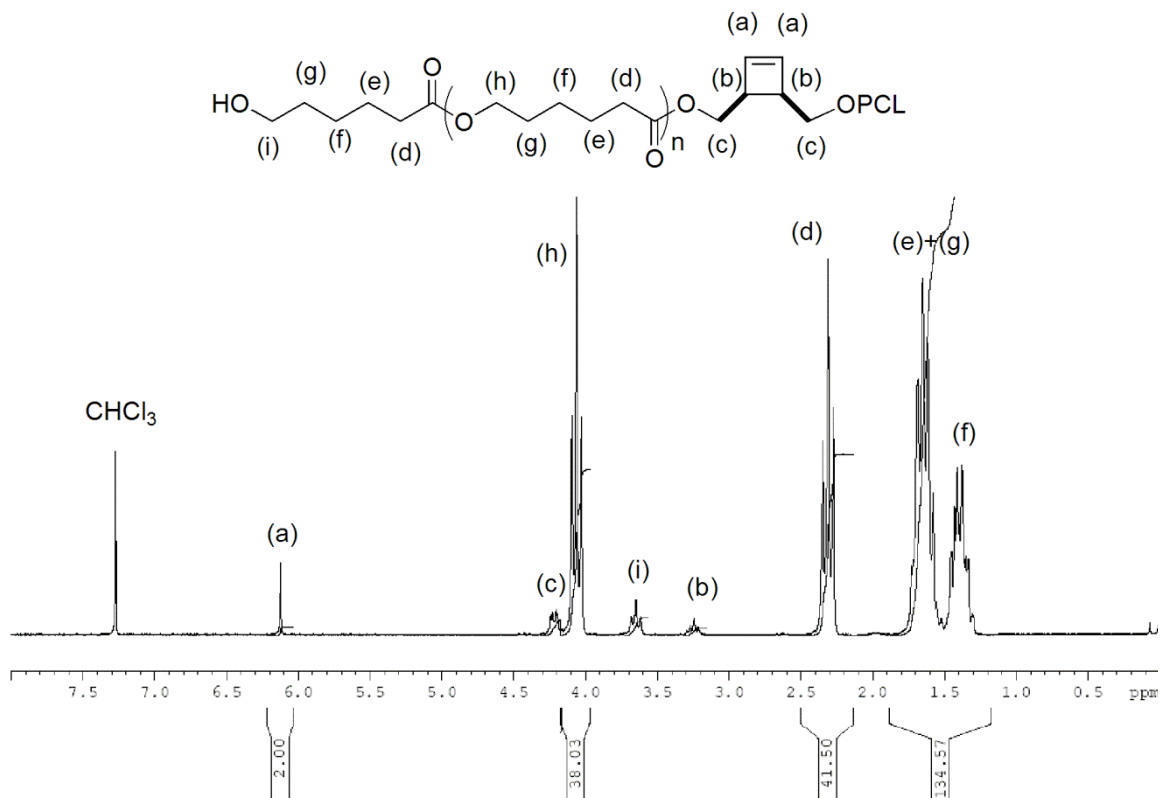

**Figure S11.** <sup>1</sup>H NMR spectrum (200 MHz, CDCl<sub>3</sub>, 25 °C) of **2-PCL**<sub>19</sub> issued from the ROP of CL in THF at 25 °C using inimer **2** as the initiator and TBD as the catalyst with a [CL]<sub>0</sub>/[**2**]<sub>0</sub> ratio of 18 (Table 2, run 1).

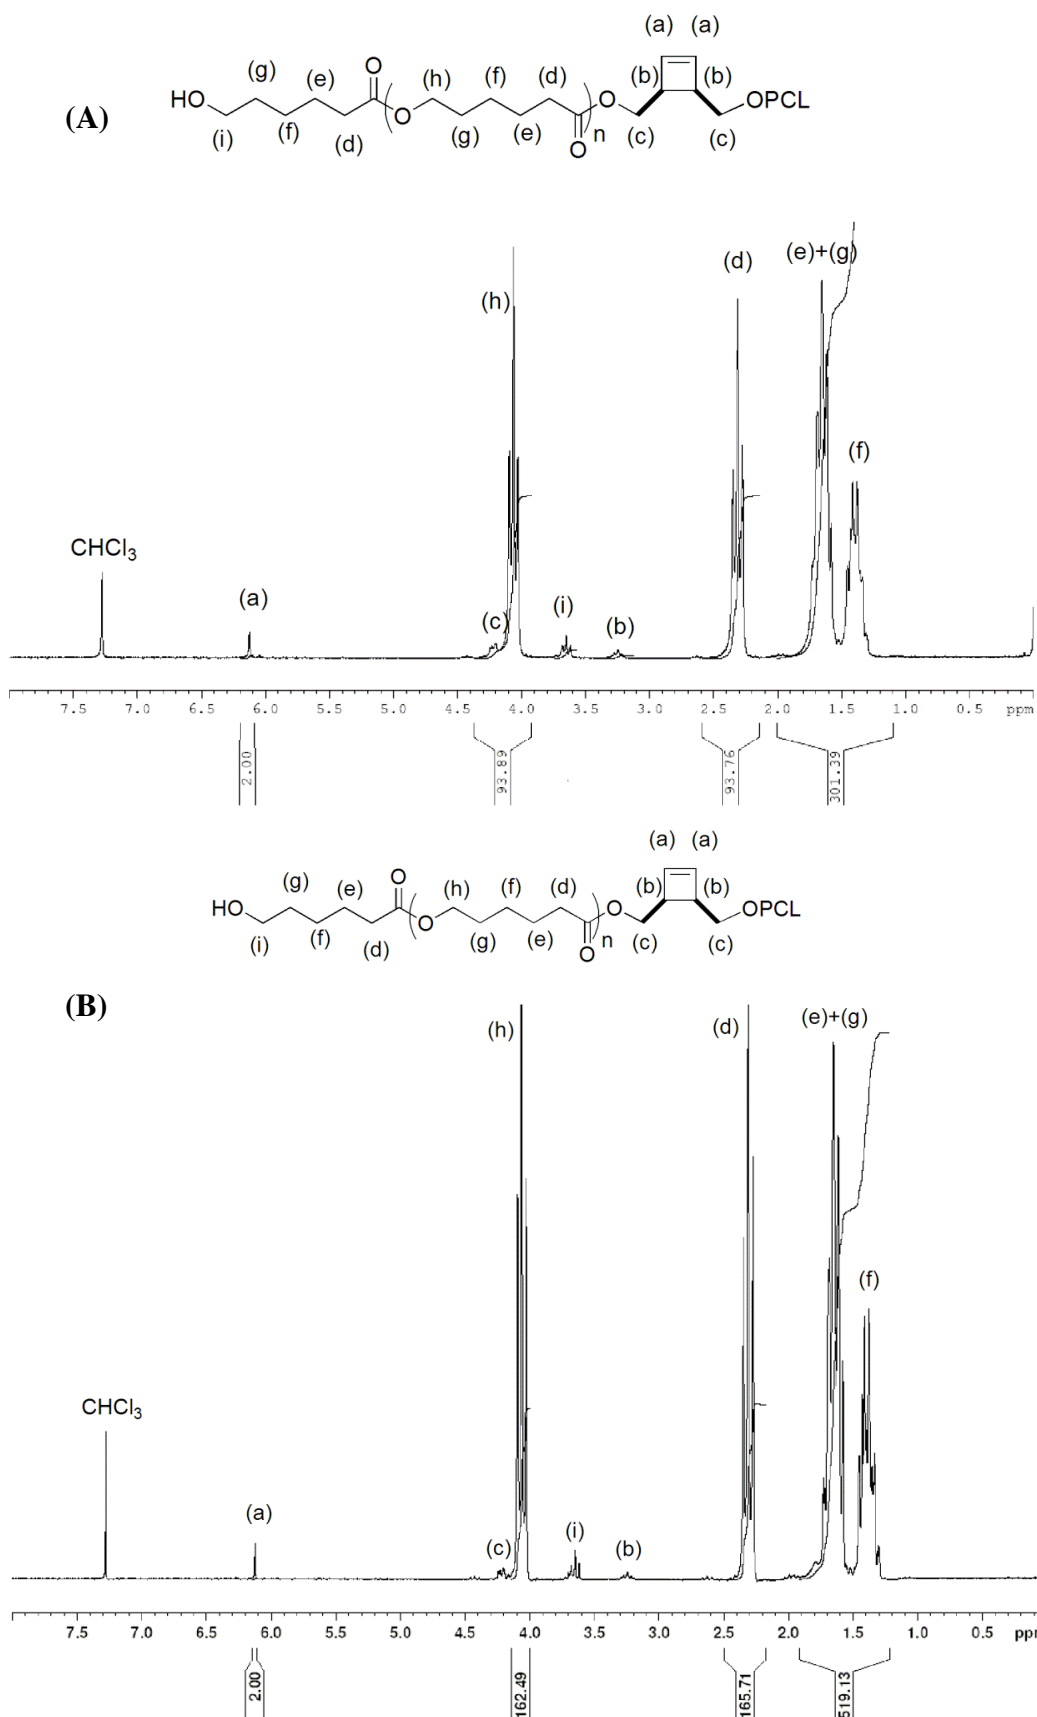

**Figure S12.**  $^1\text{H}$  NMR spectra (200 MHz,  $\text{CDCl}_3$ , 25  $^\circ\text{C}$ ) of **2-PCL** issued from the ROP of CL in toluene at 25  $^\circ\text{C}$  using inimer **2** as the initiator and TBD as the catalyst with a  $[\text{CL}]_0/[\mathbf{2}]_0$  ratio of (A) 48 (Table 2, run 2) and (B) 96 (Table 2, run 3).

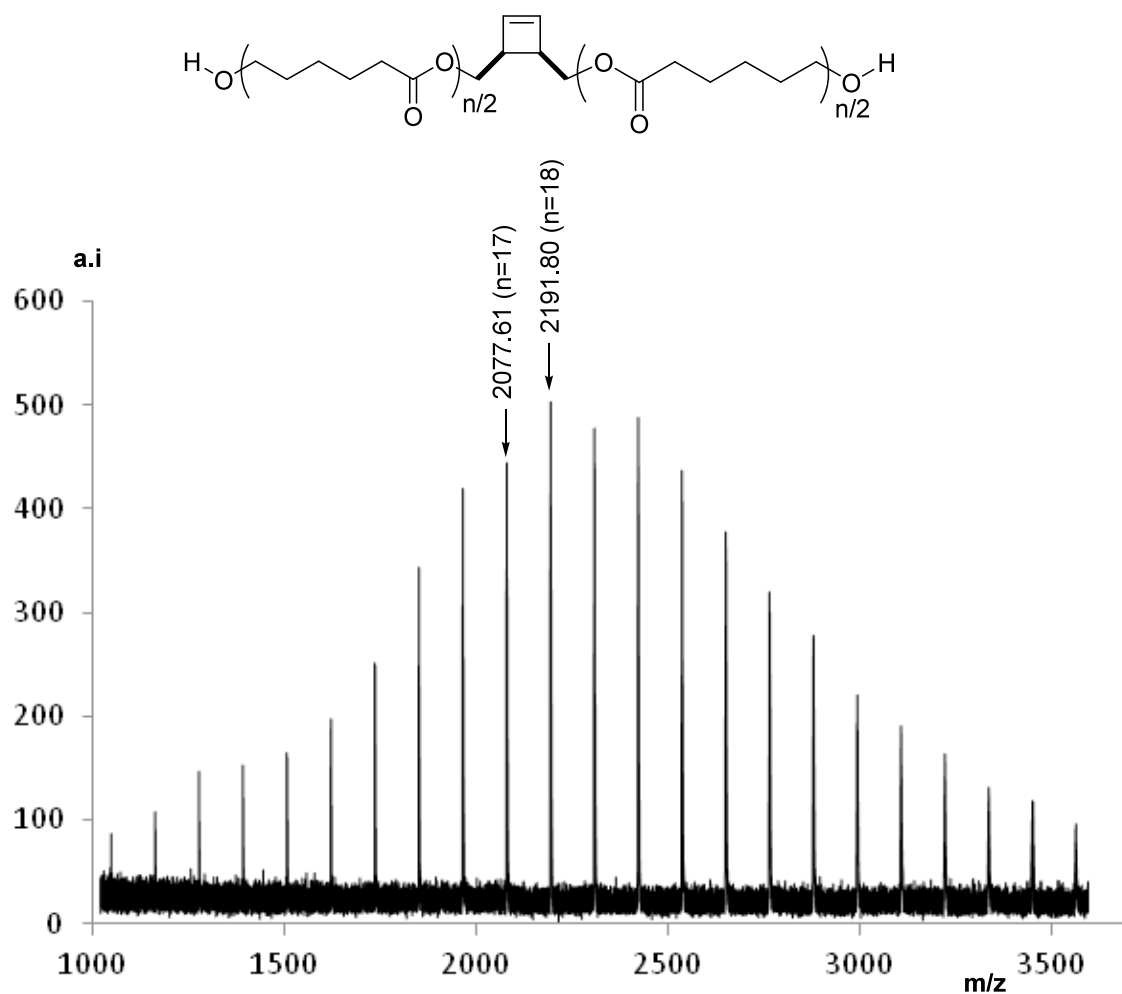

**Figure S13.** MALDI-TOF mass spectrum (matrix: DCTB + NaTFA) of the cyclobutenyl-functionalized PCL synthesized by ROP using inimer **2** as the initiator and TBD as the catalyst in THF at 25 °C with  $[CL]_0/[2]_0 = 18/1$  (Table 2, run 1).

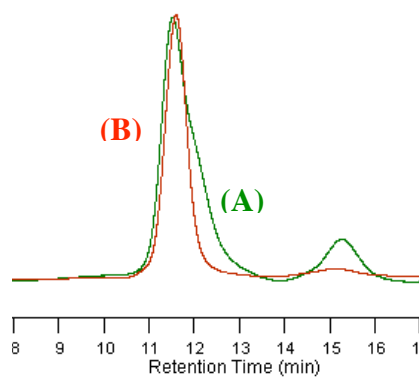

**Figure S14.** SEC traces for the (A) **PBu<sub>50</sub>-g-3-PCL<sub>16</sub>** without purification with a macromonomer concentration of 0.01 M (Table 3, run 2) and (B) **PBu<sub>100</sub>-g-3-PCL<sub>16</sub>** without purification with a macromonomer concentration of 0.04 M (Table 3, run 3).

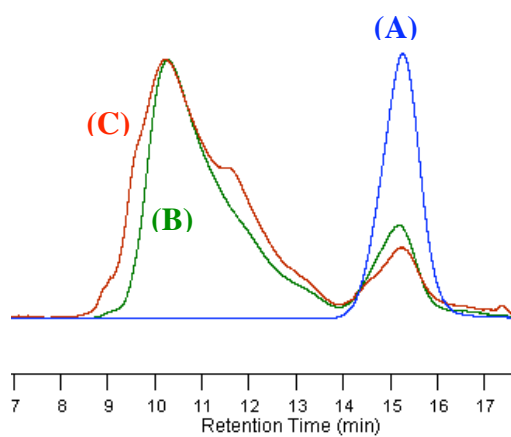

**Figure S15.** SEC traces for the (A) **3-PCL<sub>16</sub>** (Table 2, run 4), (B) **PBu<sub>100</sub>-g-3-PCL<sub>16</sub>** without purification after a reaction time of 3h (Table 3, run 3) and (C) **PBu<sub>100</sub>-g-3-PCL<sub>16</sub>** without purification after a reaction time of 24h.

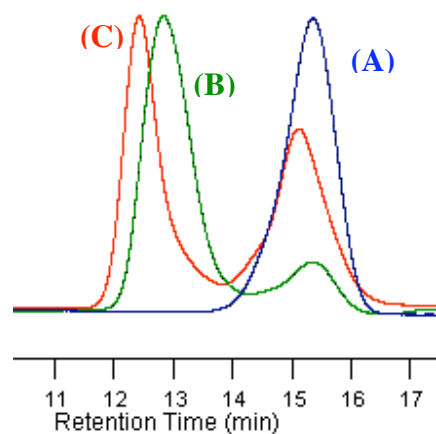

**Figure S16.** SEC traces for the (A) **3-PLA<sub>24</sub>** (Table 1, run 3), (B) **PBu<sub>10</sub>-g-3-PLA<sub>24</sub>** without purification (Table 3, run 13) and (C) **PBu<sub>50</sub>-g-3-PLA<sub>24</sub>** without purification (Table 3, run 14).



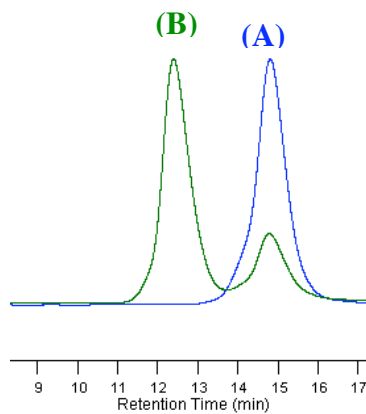

**Figure S17.** SEC traces for the (A) **3-PCL<sub>42</sub>** (Table 2, run 5) and (B) **PBu<sub>10</sub>-3-PCL<sub>42</sub>** (Table 3, run 5).

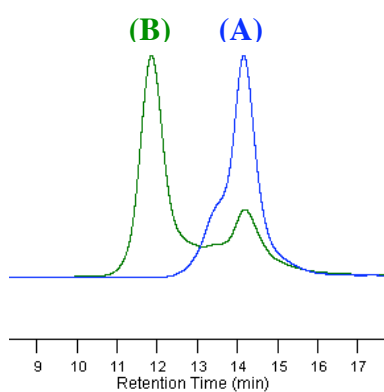

**Figure S18.** SEC traces for the (A) **3-PCL<sub>84</sub>** (Table 2, run 6) and (B) **PBu<sub>10</sub>-3-PCL<sub>84</sub>** (Table 3, run 6).

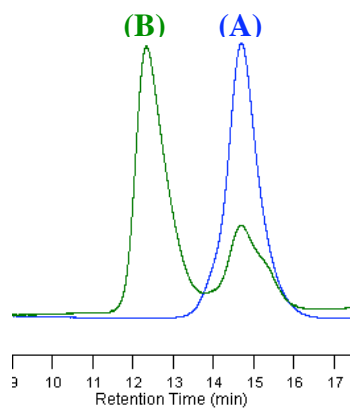

**Figure S19.** SEC traces for the (A) **3-PLA<sub>41</sub>** (Table 1, run 5) and (B) **PBu<sub>10</sub>-3-PLA<sub>41</sub>** (Table 3, run 15).

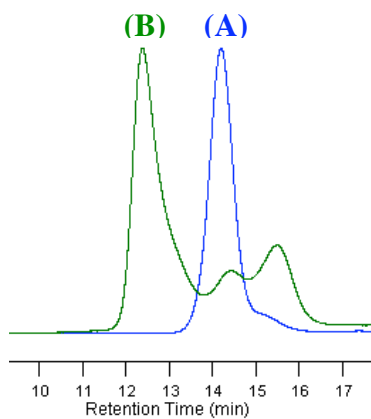

**Figure S20.** SEC traces for the (A) **2-PLA<sub>40</sub>** (Table 1, run 8) and (B) **PBu<sub>10</sub>-2-PLA<sub>40</sub>** (Table 3, run 19).

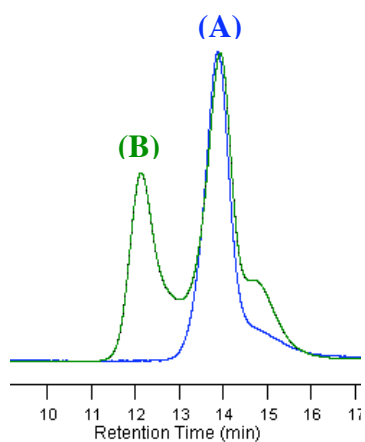

**Figure S21.** SEC traces for the (A) **2-PLA<sub>77</sub>** (Table 1, run 9) and (B) **PBu<sub>10</sub>-2-PLA<sub>77</sub>** (Table 3, run 20).

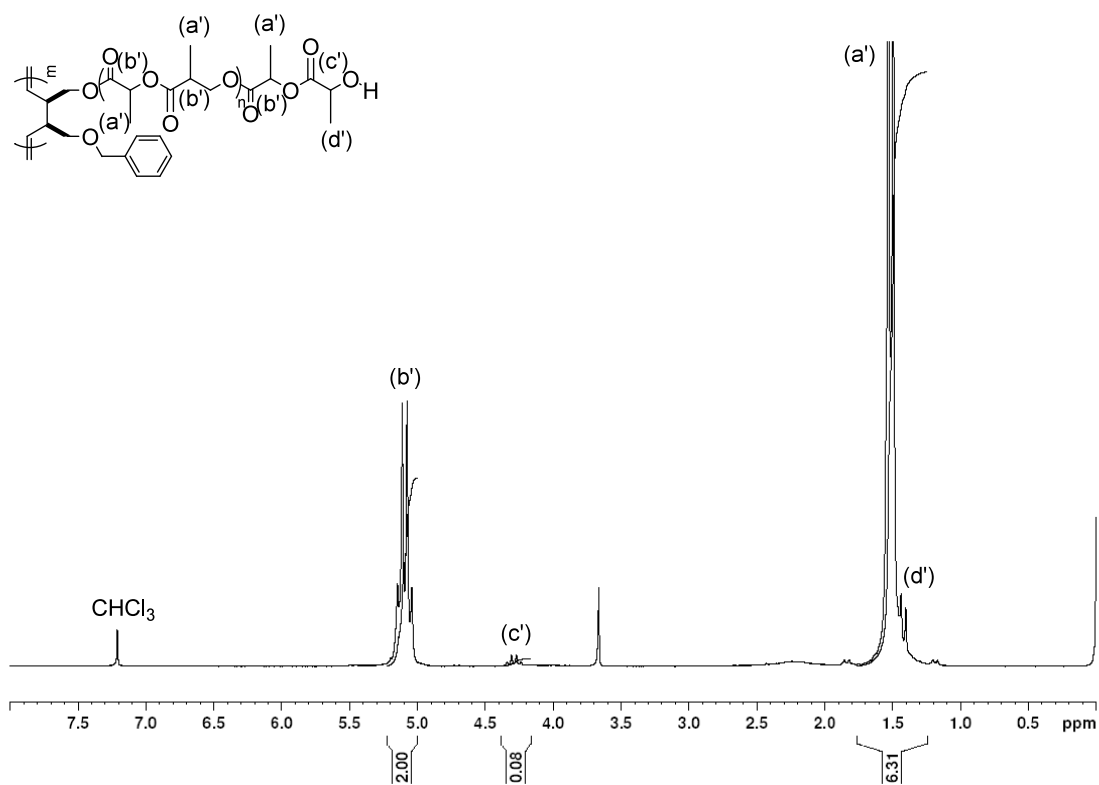

**Figure S22.** <sup>1</sup>H NMR spectrum (200 MHz, CDCl<sub>3</sub>, 25 °C) of crude **PBu<sub>10</sub>-g-3-PLA<sub>24</sub>** issued from the ROMP of **3-PLA<sub>24</sub>** in dichloroethane at 70 °C using **G2** as the catalyst for a reaction time of 3 h (Table 3, run 13).

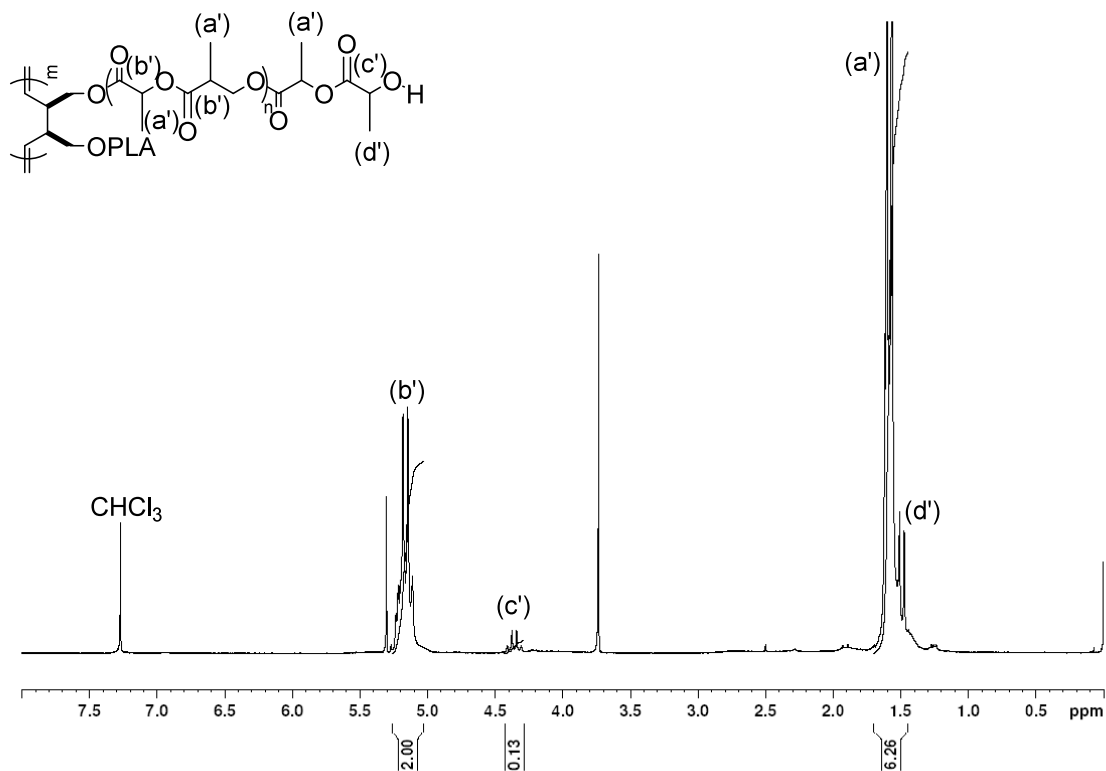

**Figure S23.**  $^1\text{H}$  NMR spectrum (200 MHz,  $\text{CDCl}_3$ , 25  $^\circ\text{C}$ ) of crude **PBu<sub>10</sub>-g-2-PLA<sub>20</sub>** issued from the ROMP of **2-PLA<sub>20</sub>** in dichloroethane at 70  $^\circ\text{C}$  using **G2** as the catalyst for a reaction time of 3 h (Table 3, run 17).

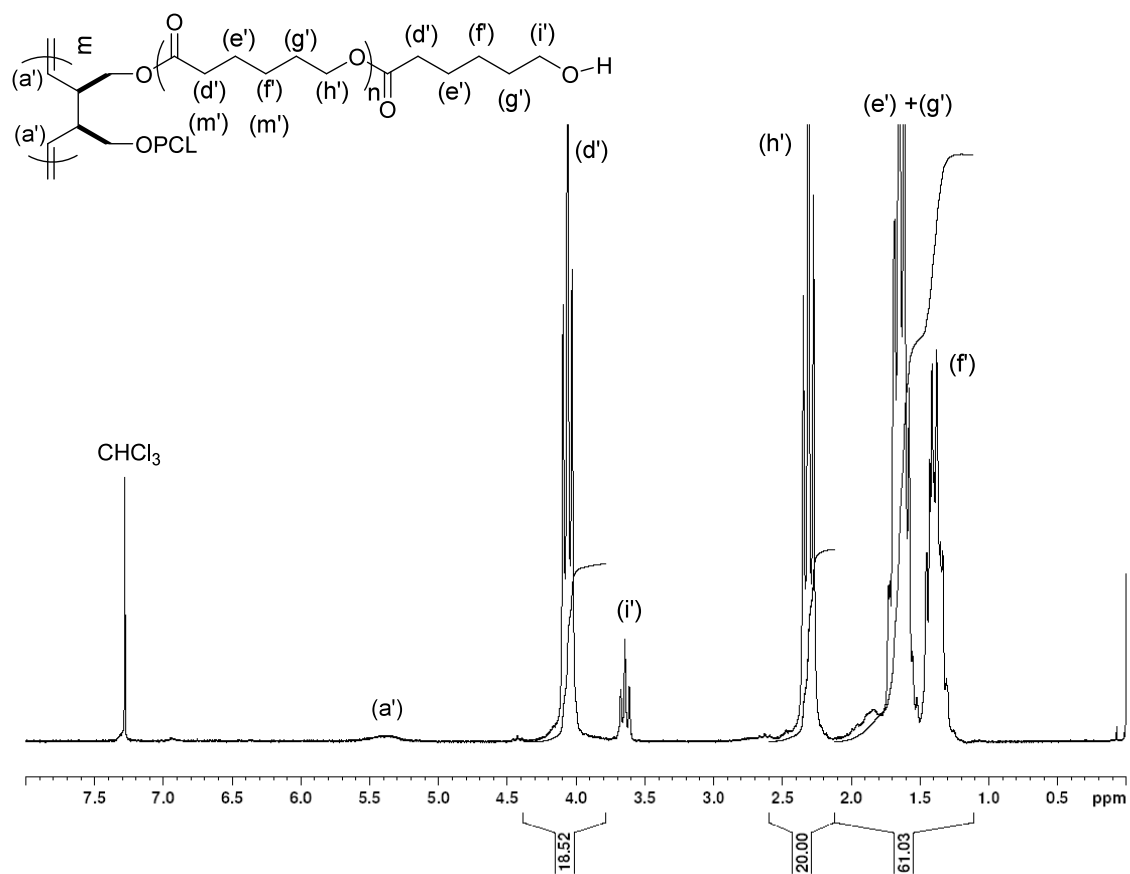

**Figure S24.**  $^1\text{H}$  NMR spectrum (200 MHz,  $\text{CDCl}_3$ , 25  $^\circ\text{C}$ ) of crude  $\text{PBu}_{10}\text{-g-2-PCL}_{19}$  issued from the ROMP of  $2\text{-PLA}_{19}$  in toluene at 70  $^\circ\text{C}$  using **G2** as the catalyst for a reaction time of 3 h (Table 3, run 7).
